# Supplementary material for: Starting to Gel: How Arabidopsis Seed Coat Epidermal Cells Produce Specialized Secondary Cell Walls
Source: MDPI journal article supplement (doi:10.3390/ijms16023452), 2015-02-04
Supplement: s1 [file s1]

# Supplemental Methods

## Plant Growth and Seed Harvesting

Seeds for all the lines analyzed in this review were ordered from the Nottingham Arabidopsis Stock Centre (NASC), except from *pmei6-1* seeds, which were obtained from Dr. Helen North (INRA, Versailles). Seeds were germinated under continuous light on ½ Murashige and Skoog (MS) plates, containing 2.15 g/L MS basal salts (Sigma M5519-10L) and 0.7 g/L agar (Cat# 4807.2; Carl Roth, Karlsruhe, Germany). After five to seven days, seedlings were transplanted to individual 7 × 7 × 8 cm pots filled with peat-sand-pumice substrate (SoMi 513 Dachstauden, HAWITA GRUPPE GmbH, Vechta, Germany). Plants were grown in a chamber with constant light (around 170·μE·m<sup>-2</sup>·s<sup>-1</sup>), temperature (20 °C) and relative humidity (60%). When starting to bolt, plants were covered with ARACON tubes (Betatech bvba, Gent, Belgium), to prevent cross fertilization of flowers and seed dispersal. The seed to seed generation time under our growth conditions is around 60 days. Mature plants were cut from their base and mature seeds were harvested by shaking each plant into a different large brown paper bag.

## Touch-and-Go PCR Genotyping

The PCR genotyping was carried out using the previously described Touch-and-Go method [96], and a mixture of two gene-specific primers and a T-DNA-specific primer. Col-0 WT and negative controls were always included alongside the unknown samples. The gene-specific primers used are listed in Supplemental Table S4. One of the following primers used to amplify each T-DNA insert: SALK LBb1.3 (5'-ATTTTGCCGATTTCGGAAC-3'), SAIL LB3 (5'-TAGCATCTGAATTTTCATAACCAATCTCGATACAC-3'), GK o8409 (5'-ATATTGACCATCATA CTCATTGC-3'), SM Spm32 (5'-TACGAATAAGAGCGTCCATTTTAGAGTGA-3').

## Ruthenium Red Staining

Staining was carried out using cell culture plates with 24 wells (Cat# 734-2325, VWR International GmbH, Darmstadt, Germany). Wells were first filled with 500 μL water, then around 30 seeds were added to each well. The seeds were hydrated for 5 min, with occasional mixing. The water was then removed and 300 μL of 0.01% (w/v) ruthenium red as added. After staining for 5 min, the solution was replaced with 300 μL of water. Each well was imaged with a Leica MZ12 stereomicroscope equipped with a Leica DFC 295 camera. Image size and contrast of images were processed in Fiji (available online: <http://fiji.sc/Fiji>).

## Total Mucilage Extraction

Around 5 mg seeds were precisely weighed in 2 mL Safe-Lock Eppendorf tubes. A serial dilution of a nine-sugar mixture (Fuc, Rha, Ara, Gal, Glc, Xyl, Man, GalA, GlcA) added to 2 mL screw-cap tubes. 1 mL of water, containing 30 μg of ribose as an internal standard, was added to all the samples and standards. Total mucilage was extracted by vigorously shaking the seed-containing tubes for 15 min at 30 Hz in a Retsch Mill using two 24 TissueLyser Adapters (Qiagen, Hilden, Germany). The adapters were then rotated 180 degrees and mixed for an additional 15 min at 30 Hz. The seeds

were allowed to settle at the bottom of each tube, and 800  $\mu$ L of the supernatant was transferred to a screw-cap tube. Samples and standards were dried under pressurize air at 45 °C using a Techne Dri-Block DB 3D heater. Once dry, 300  $\mu$ L of 2 M trifluoroacetic acid (TFA) was added to each tube. Tubes were capped tightly, vortexed, and heated for 90 min at 121 °C. The heating blocks and the samples were then rapidly cooled on ice. After brief centrifugation, tubes were uncapped and the TFA was evaporated under pressurized air at 45 °C. Dried samples and standards were then re-suspended in 600  $\mu$ L water. Monosaccharides were quantified by High-Performance Anion-Exchange Chromatography with Pulsed Amperometric Detection (HPAEC-PAD) using a Dionex system equipped with a CarboPac PA20 column and GP50, ED50, and AS50 modules. Neutral sugars were separated using 2 mM NaOH at a flow rate of 0.4 mL/min over the course of 20 min. Afterwards, 513 mM NaOH was used for 10 min to detect uronic acids. The amount of each monosaccharide was normalized to the internal standard and quantified using a standard calibration curve.

**Table S2.** An overview of Arabidopsis genes implicated in seed mucilage production. Gene expression during seed coat development was qualitatively assessed using the eFP seed (available online: <http://bar.utoronto.ca/efp/cgi-bin/efpWeb.cgi?dataSource=Seed>), and the eFP seed coat (SC) (available online: [http://bar.utoronto.ca/efp\\_seedcoat/cgi-bin/efpWeb.cgi](http://bar.utoronto.ca/efp_seedcoat/cgi-bin/efpWeb.cgi)) microarrays. The expression profiles show strong (green), moderate (yellow), or weak (red) specificity to mucilage production.

| AGI Code  | Gene Name           | Functional Class     | eFP      | eFP SC   |
|-----------|---------------------|----------------------|----------|----------|
| At1g02720 | <i>GATL5</i>        | GT                   | Strong   | Strong   |
| At1g09330 | <i>ECH</i>          | Secretion            | Weak     | Weak     |
| At1g09540 | <i>MYB61</i>        | TF                   | no probe | Weak     |
| At1g18580 | <i>GAUT11</i>       | GT                   | Weak     | Weak     |
| At1g21070 | <i>URGT2</i>        | Sugar Transporter    | Strong   | Strong   |
| At1g52880 | <i>NARS2</i>        | TF                   | Strong   | Strong   |
| At1g53500 | <i>RHM2/MUM4</i>    | Sugar Synthase       | Strong   | Strong   |
| At1g56650 | <i>MYB75</i>        | TF                   | Weak     | Weak     |
| At1g62990 | <i>KNAT7</i>        | TF                   | Moderate | Moderate |
| At1g63650 | <i>EGL3</i>         | TF                   | Weak     | Moderate |
| At1g76880 | <i>DF1</i>          | TF                   | Weak     | Weak     |
| At1g79840 | <i>GL2</i>          | TF                   | Strong   | Strong   |
| At2g18840 | <i>YIP4a</i>        | Secretion            | Moderate | Weak     |
| At2g32700 | <i>MUM1/LUH</i>     | TF                   | Weak     | Weak     |
| At2g35620 | <i>FEI2</i>         | Receptor             | Moderate | Strong   |
| At2g37260 | <i>TTG2</i>         | TF                   | Weak     | Weak     |
| At2g47670 | <i>PMEI6</i>        | Protein Modification | Strong   | Strong   |
| At3g10380 | <i>SEC8</i>         | Secretion            | Weak     | Strong   |
| At3g13540 | <i>MYB5</i>         | TF                   | Moderate | Weak     |
| At3g15510 | <i>NARS1</i>        | TF                   | Strong   | Strong   |
| At3g46550 | <i>SOS5/FLA4</i>    | AGP                  | no probe | Weak     |
| At3g50990 | <i>PER36</i>        | Peroxidase           | Strong   | Strong   |
| At4g09820 | <i>TT8</i>          | TF                   | Strong   | Strong   |
| At4g28370 | <i>FLY1</i>         | Protein Modification | Strong   | Strong   |
| At4g30260 | <i>YIP4b</i>        | Secretion            | Moderate | Weak     |
| At4g36920 | <i>AP2</i>          | TF                   | Moderate | Weak     |
| At5g03540 | <i>Exo70A1</i>      | Secretion            | no probe | Weak     |
| At5g09870 | <i>CESA5</i>        | GT                   | Weak     | Weak     |
| At5g22740 | <i>CSLA2</i>        | GT                   | Weak     | Strong   |
| At5g23940 | <i>DCR2</i>         | Cuticle              | Moderate | Moderate |
| At5g24520 | <i>TTG1</i>         | TF                   | Moderate | Weak     |
| At5g35550 | <i>TT2</i>          | TF                   | Weak     | Weak     |
| At5g42630 | <i>ATS</i>          | TF                   | Weak     | Weak     |
| At5g49360 | <i>BXL1</i>         | GH                   | Strong   | Strong   |
| At5g63800 | <i>MUM2/BGAL6</i>   | GH                   | Weak     | Strong   |
| At5g63840 | <i>RSW3</i>         | Secretion            | Weak     | Weak     |
| At5g67360 | <i>SBT1.7/ARA12</i> | Protein Modification | Strong   | Strong   |

**Table S3.** Monosaccharide composition of mucilage in transcription factor mutants. The relative composition of each monosaccharide is shown as mol %, while the total mucilage content was calculated as nmol sugar/mg seed. Values represent the mean  $\pm$  SD of three biological replicates for each mutant and six for the WT. Total mucilage was extracted by vigorously shaking 5 mg seeds in 1 mL water using a Retsch Mill for 30 min at 30 Hz.

|       | WT                 | <i>myb5-2</i>    | <i>knat7-1</i>    | <i>myb61-7</i>    | <i>df1-1</i>     | <i>ttg2-3</i>    |
|-------|--------------------|------------------|-------------------|-------------------|------------------|------------------|
| Rha   | 40.22 $\pm$ 1.04   | 44.82 $\pm$ 1.26 | 41.48 $\pm$ 0.47  | 41.23 $\pm$ 2.24  | 43.20 $\pm$ 0.42 | 47.24 $\pm$ 2.88 |
| Ara   | 1.55 $\pm$ 0.16    | 1.75 $\pm$ 0.22  | 2.36 $\pm$ 0.16   | 1.79 $\pm$ 0.30   | 1.93 $\pm$ 0.08  | 3.43 $\pm$ 1.42  |
| Gal   | 2.61 $\pm$ 0.31    | 2.44 $\pm$ 0.31  | 3.48 $\pm$ 0.15   | 2.51 $\pm$ 0.26   | 2.51 $\pm$ 0.13  | 3.54 $\pm$ 0.73  |
| Glc   | 0.95 $\pm$ 0.07    | 2.13 $\pm$ 1.26  | 1.14 $\pm$ 0.12   | 1.11 $\pm$ 0.20   | 0.98 $\pm$ 0.04  | 4.98 $\pm$ 1.43  |
| Xyl   | 4.32 $\pm$ 0.35    | 3.58 $\pm$ 0.32  | 2.46 $\pm$ 0.05   | 3.10 $\pm$ 0.14   | 4.34 $\pm$ 0.21  | 2.88 $\pm$ 0.51  |
| Man   | 0.83 $\pm$ 0.05    | 1.11 $\pm$ 0.06  | 0.71 $\pm$ 0.01   | 0.66 $\pm$ 0.03   | 0.80 $\pm$ 0.01  | 1.11 $\pm$ 0.12  |
| GalA  | 49.52 $\pm$ 0.83   | 44.18 $\pm$ 1.33 | 48.37 $\pm$ 0.73  | 49.59 $\pm$ 1.52  | 46.24 $\pm$ 0.07 | 36.83 $\pm$ 5.96 |
| Total | 132.38 $\pm$ 10.80 | 54.69 $\pm$ 5.93 | 138.85 $\pm$ 4.92 | 123.56 $\pm$ 9.96 | 79.70 $\pm$ 6.02 | 65.78 $\pm$ 7.55 |

**Table S4.** Gene-specific primers used to genotype insertional mutants.

| Mutant          | Polymorphism | Forward Primer (5' to 3') | Reverse Primer (5' to 3') |
|-----------------|--------------|---------------------------|---------------------------|
| <i>gat15-1</i>  | SALK_106615C | ACACTCCCCTCTCTCTCTCAC     | TCCATTTCTCAATTCGTTTCG     |
| <i>myb61-7</i>  | SALK_106556C | GAAATTTAAATTTGGCTCTGTTTG  | AAAGGCCATCTGATTTATCCG     |
| <i>gaut11-3</i> | SAIL_567_H05 | CAACCAATTGCCCAAATATTG     | GAAAACCCGAAAGGAGAAAAG     |
| <i>knat7-1</i>  | SALK_002098C | GAGATTAGTGTTTGCCTTGG      | TATGCGTAAGGGCATATCAGG     |
| <i>df1-1</i>    | SALK_106258C | AGACGCTAGCGTTAAAGGTCC     | CAAGAATTTGCGTTGAAGCTC     |
| <i>gl2-8</i>    | SALK_130213C | ACCACCGATCAGATCAGACAC     | GGAGTTTTTCGAGGTGGAGATC    |
| <i>fei2-2</i>   | SALK_044226  | TTGCCATCTATGGGAACCTTG     | ATTACAACCATTGTTGCAGGC     |
| <i>ttg2-3</i>   | SALK_148838  | TAAAACCAAACGACACCGTTC     | TCCAAGTTTGTTGACGATTCC     |
| <i>pmei6-1</i>  | SM_3.19557   | ATGAACCTCCCAAATACCCCTC    | GTTCCATGGCAATCACGATAC     |
| <i>myb5-2</i>   | SALK_105723C | GAACACAATTGCTCCTCAAGG     | GACGACAGCTCTTTCCACATC     |
| <i>sos5-2</i>   | SALK_125874  | GAAACTGGGAATAACCTTCGG     | AGCTTCTCGAGACCAAACCTC     |
| <i>per36-1</i>  | SAIL_194_G03 | AGATTAAAGAGAAGCTGCCGG     | CAAGGCAGACTTGATCTCGTC     |
| <i>fly1-2</i>   | SALK_067290  | CGCAAGTTCAGATGCTAATGC     | AAAAAGGAACCGACAAACCTG     |
| <i>cesa5-4</i>  | SALK_207154C | CGTCTTCATCAAGTTCTTCGG     | AAATAGACGACACCACCTTCTTC   |
| <i>cs1a2-3</i>  | SALK_149092C | TAGATGGTCTTGTGGACCTGC     | CAAAAGAACCCTTGAGCTTC      |
| <i>dc1-2</i>    | SALK_128228C | ATCCACGTGGCATTCTTATGAG    | ACAATTCCAAACCAAACACAC     |
| <i>mum2-14</i>  | SALK_060221C | TATACCGAACCGACAATGAGC     | CGCGTCTTCAAAGACATAAGC     |
| <i>sbt1.7-2</i> | GK-544E06.01 | ATCCGACCATTCAATACTCCC     | TCAAACGTAGCTCCATGGATC     |
